# Supplementary figures and images for: Large tumor suppressors 1 and 2 regulate Aurora-B through phosphorylation of INCENP to ensure completion of cytokinesis
Source: PubMed Central journal article supplement — Heliyon. 2016 Jul 20;2(7):e00131. doi: 10.1016/j.heliyon.2016.e00131 (PMC4971130; doi:10.1016/j.heliyon.2016.e00131), 2016-07-20

Figure 1B

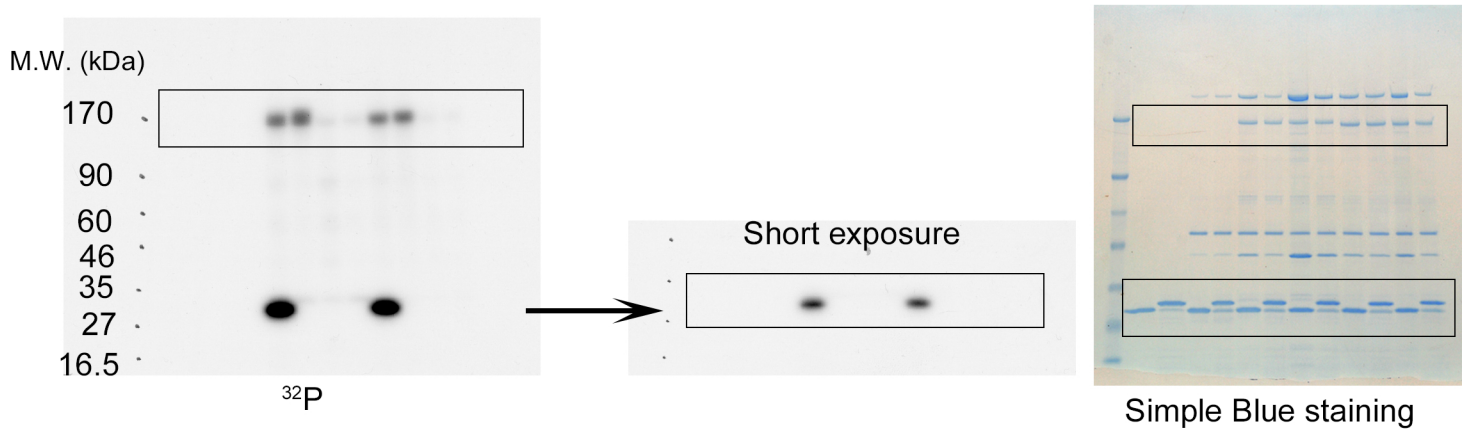

Figure 1D

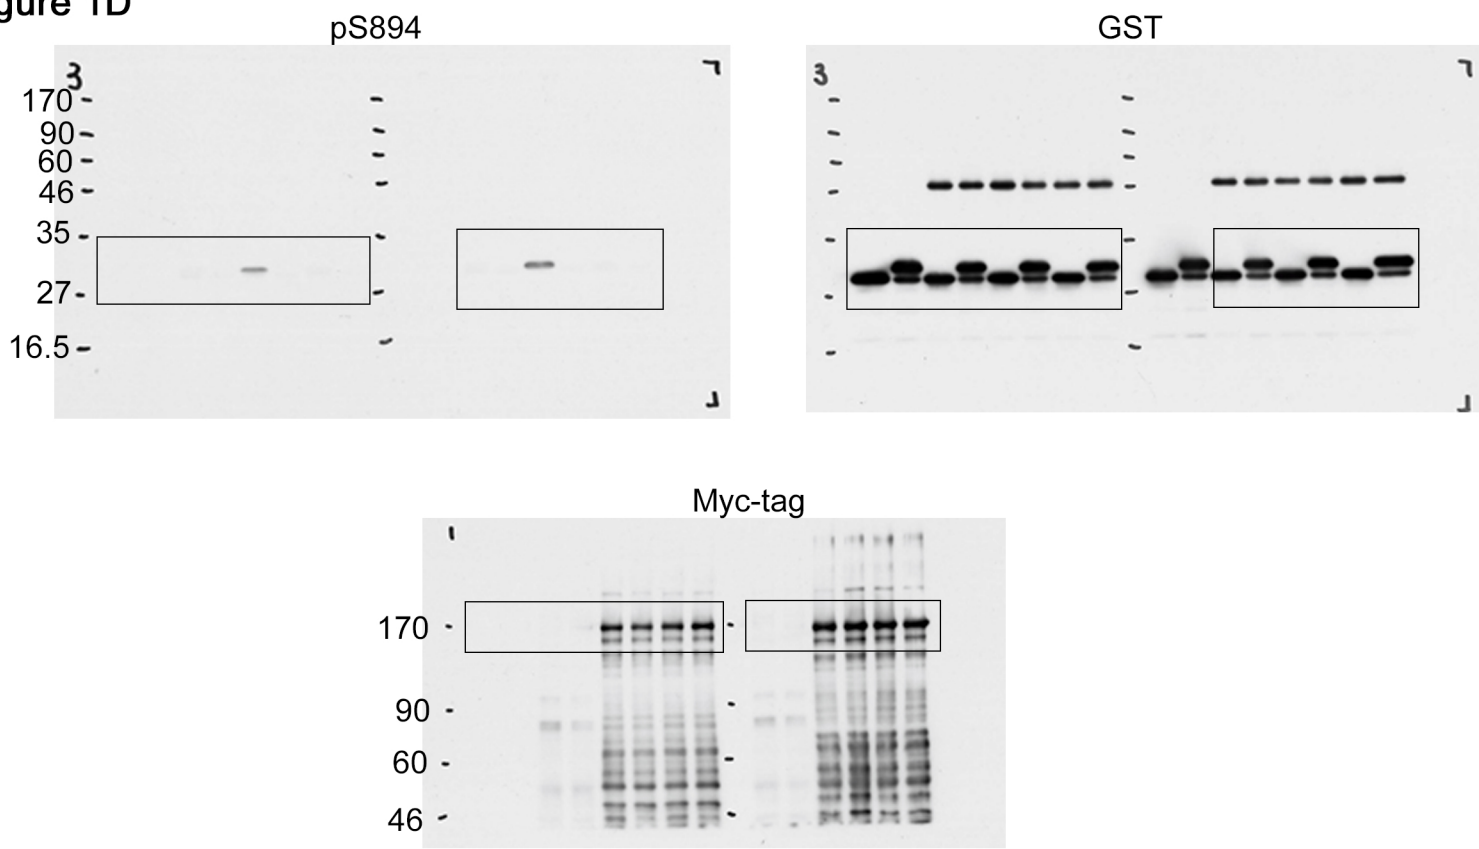

Figure 2A

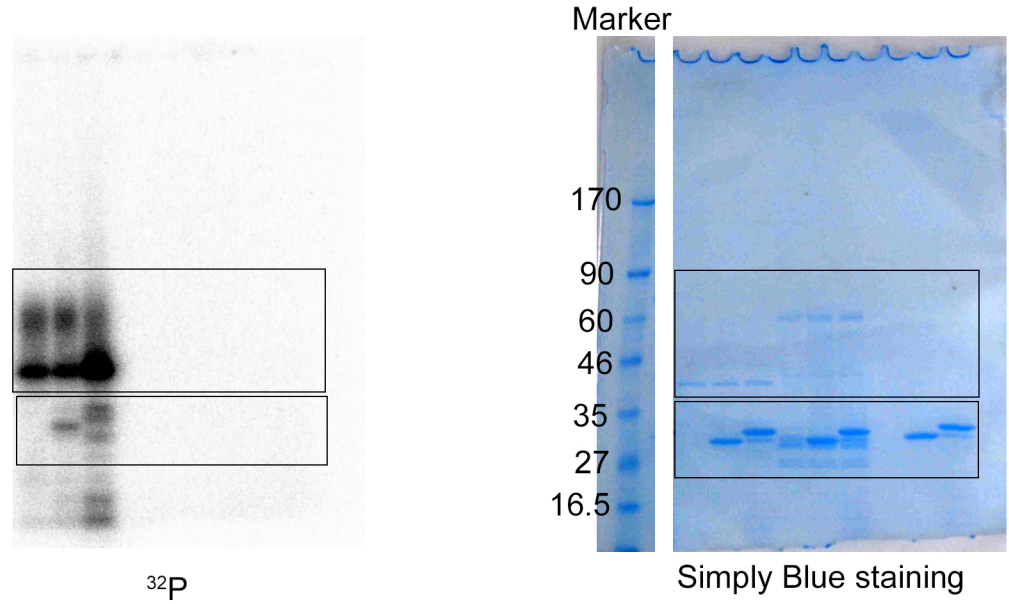

Supplement: mmc3.pdf [file mmc3.pdf]

**Figure 2B**

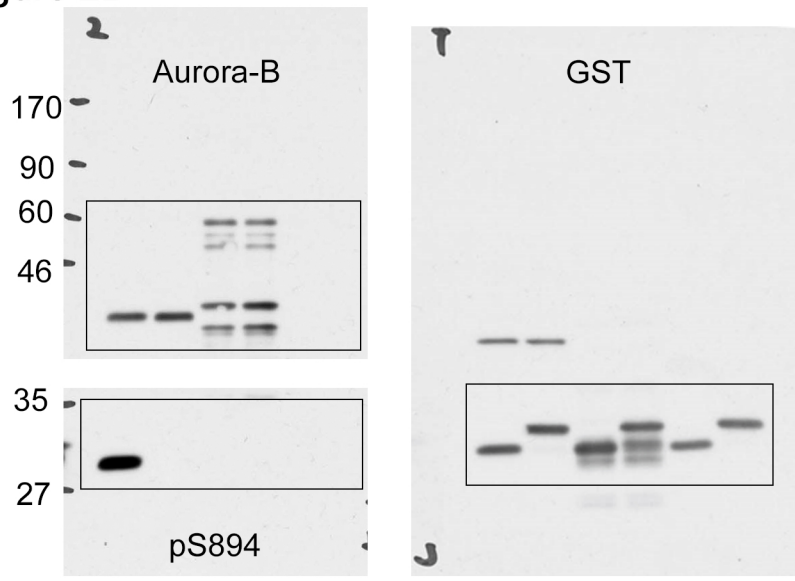

**Figure 3B**

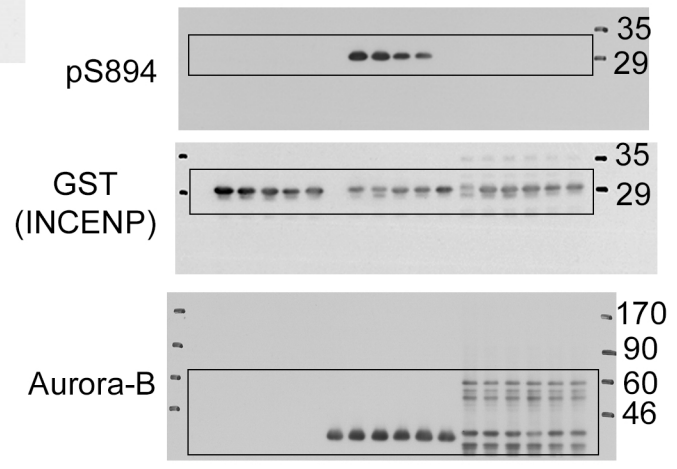

**Figure 3A**

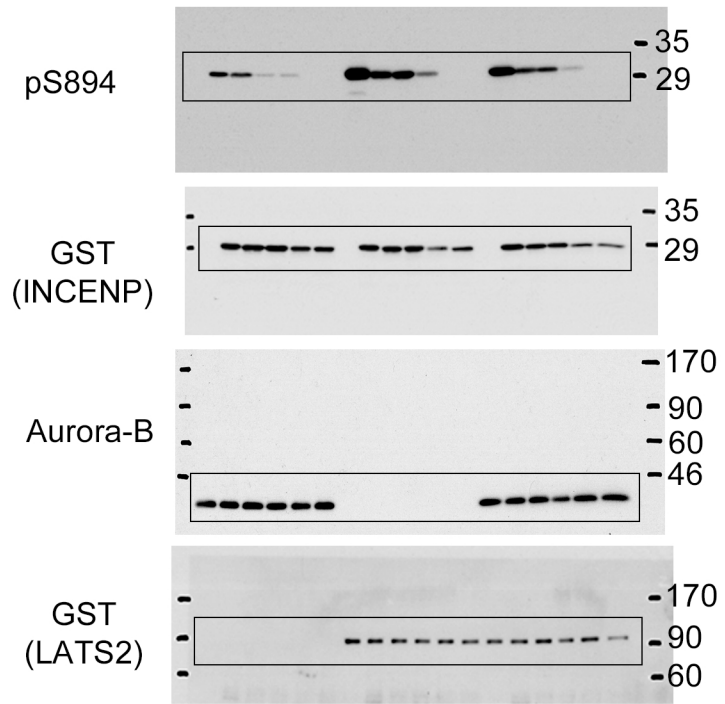

**Figure 4B**

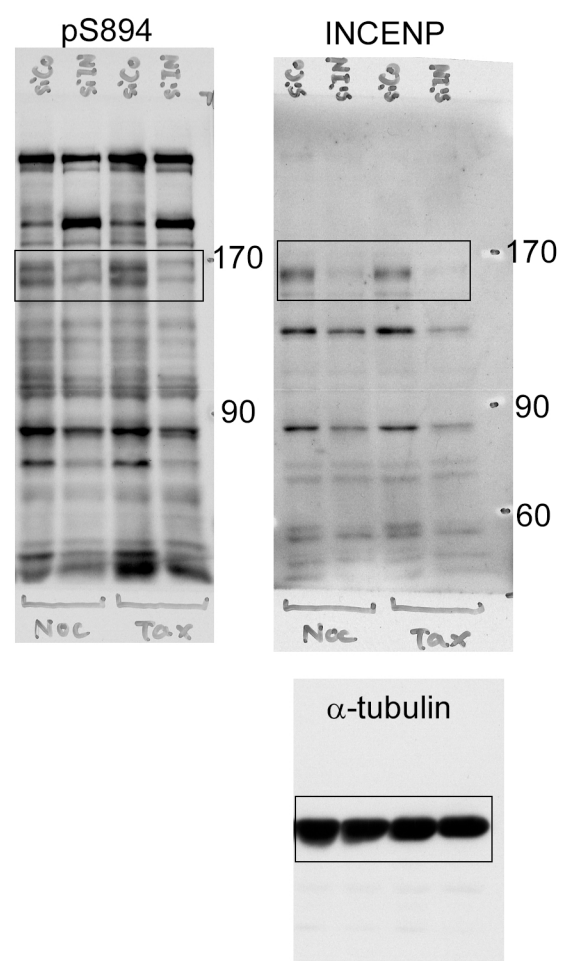

**Figure 4A**

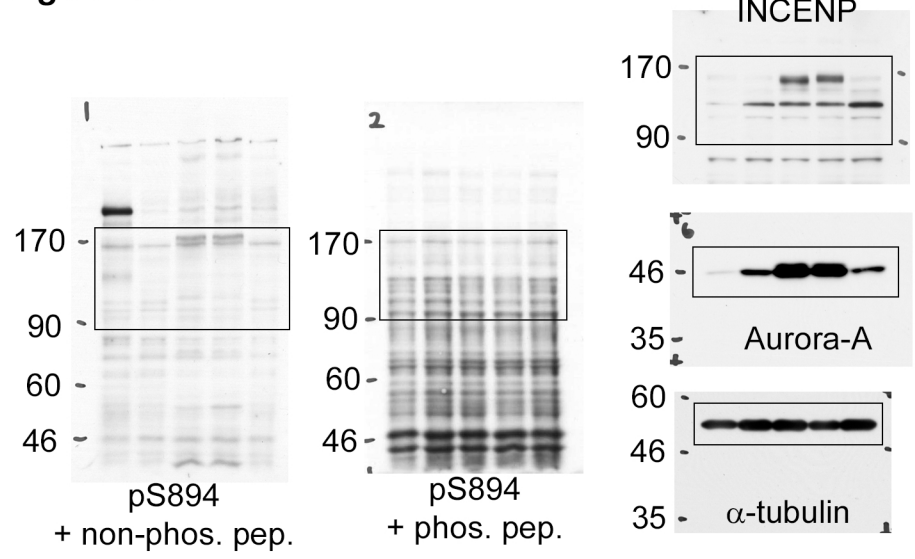

Supplement: mmc4.pdf [file mmc4.pdf]

**Figure 5A**

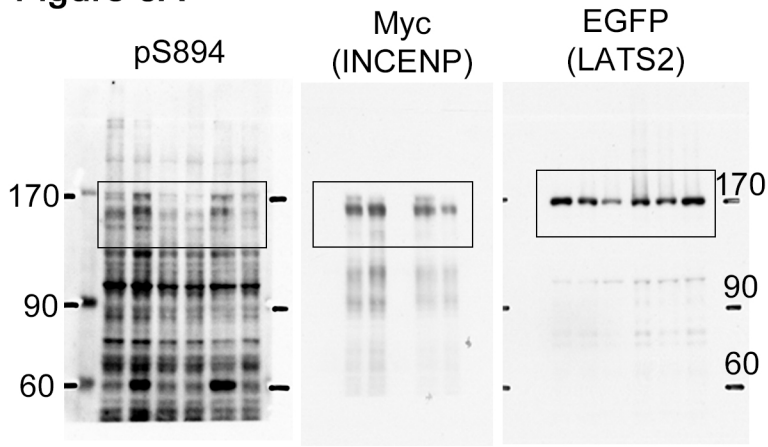

**Figure 5B**

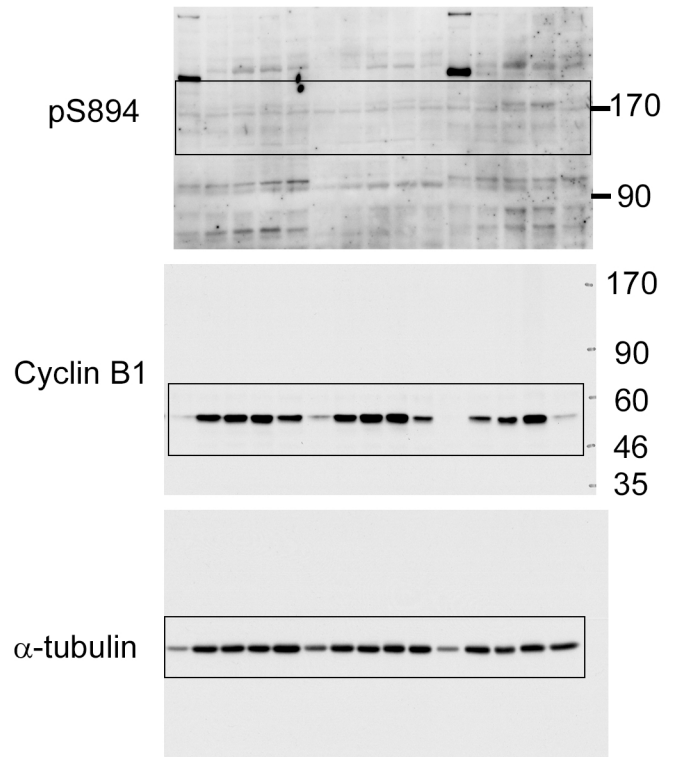

**Figure 5C**

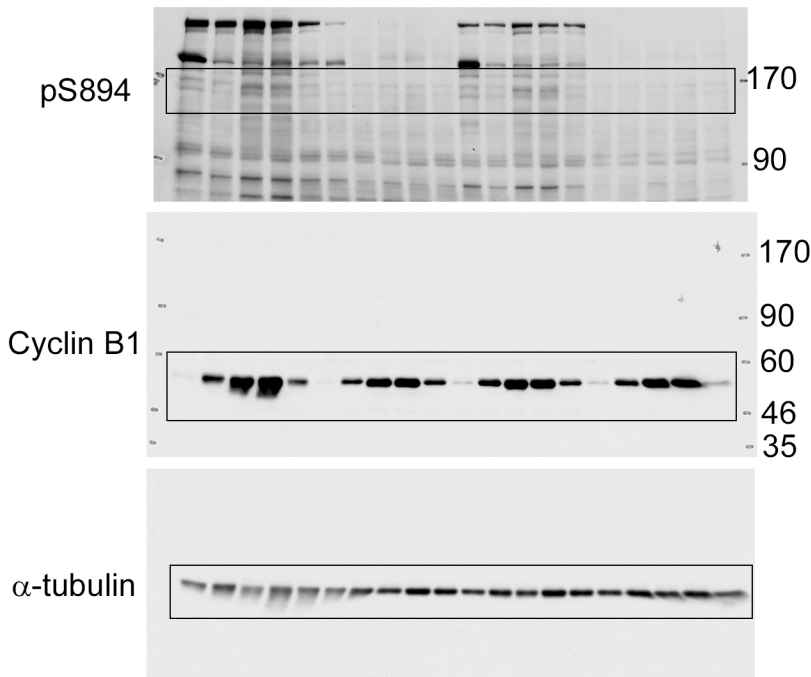

**Figure 6-#1**

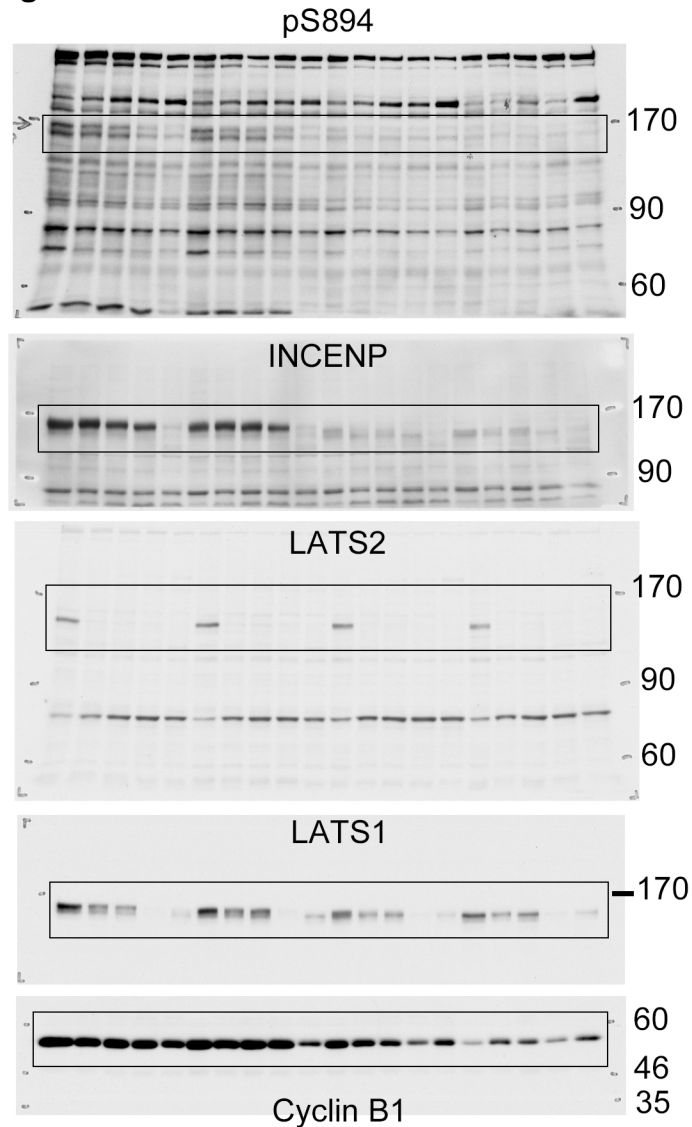

**Figure 6-#2**

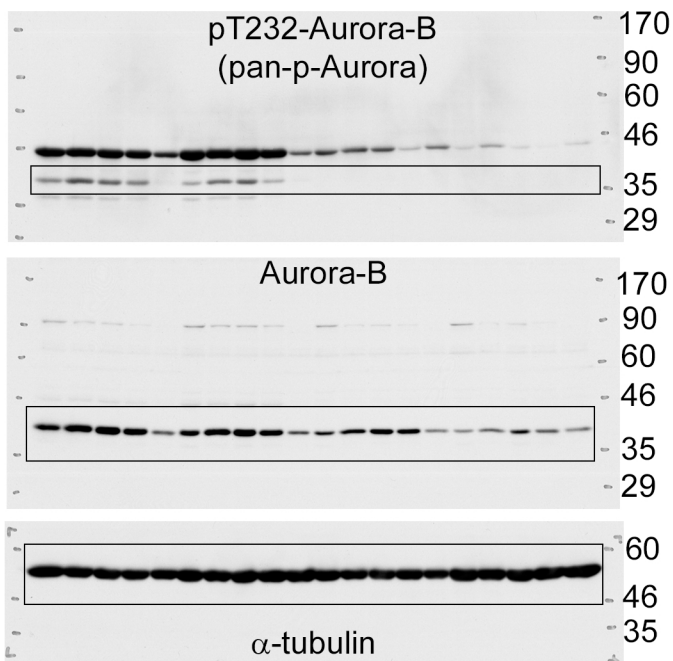

Supplement: mmc5.pdf [file mmc5.pdf]

**Figure 8A**

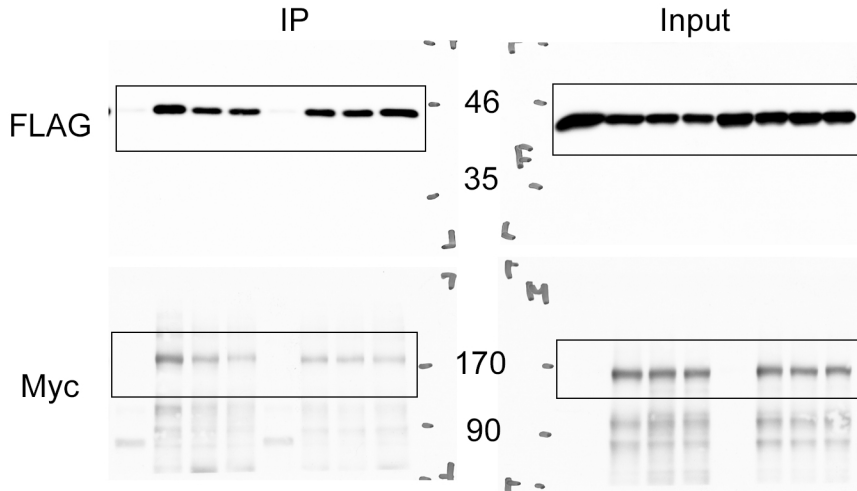

**Figure 9**

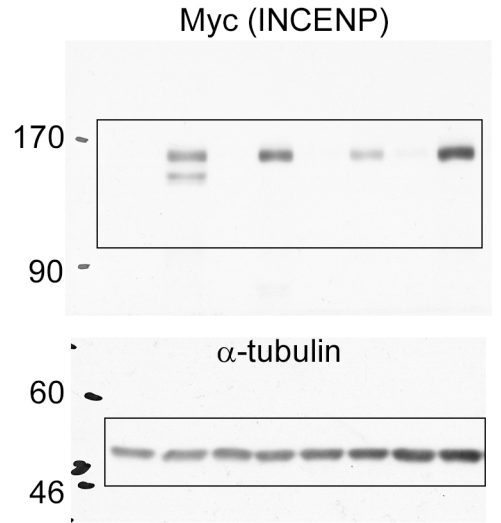

**Figure 8B-#1**

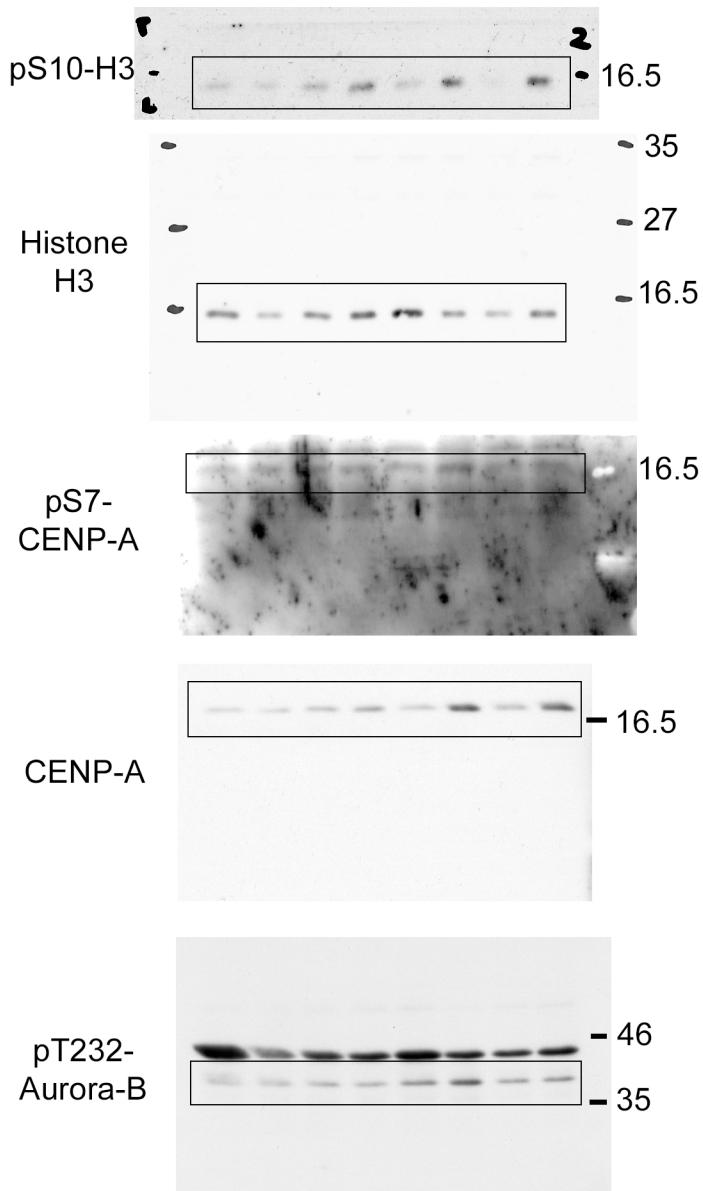

**Figure 8B-#2**

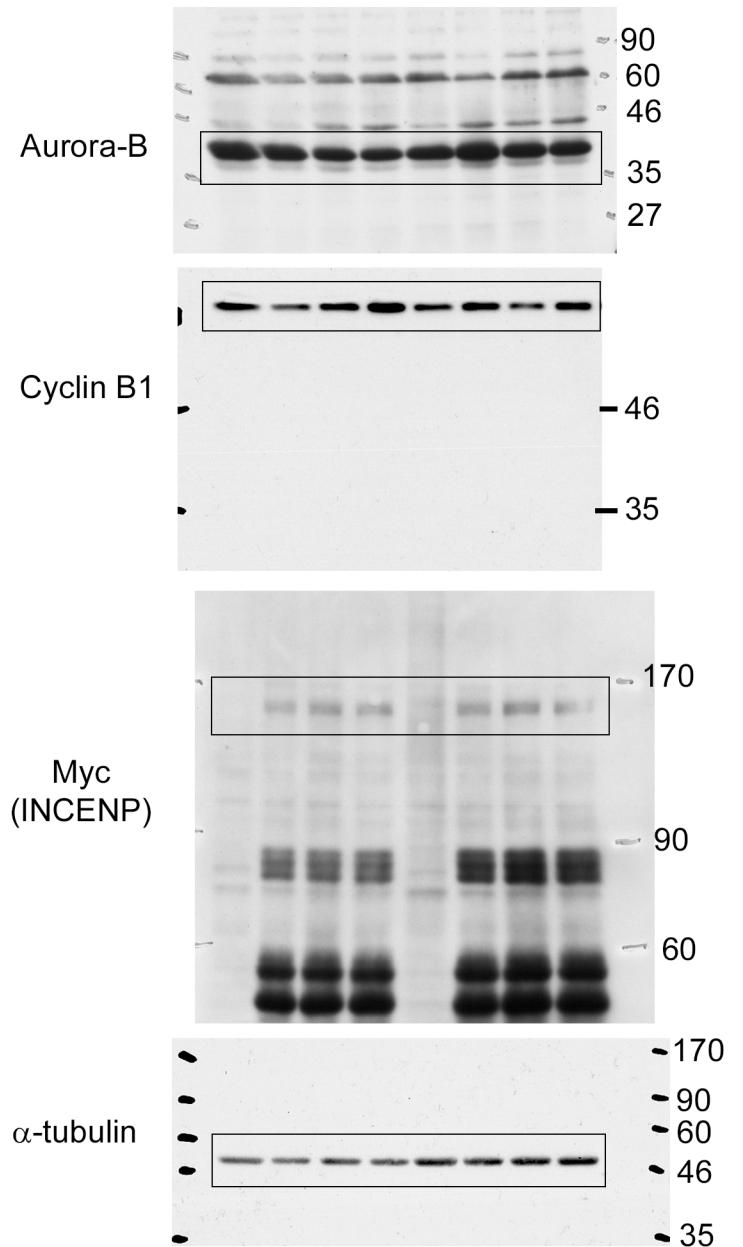

Supplement: mmc6.pdf [file mmc6.pdf]
